# Supplementary material
Source: MDPI journal article supplement (https://www.mdpi.com/2071-1050/15/18/13515)
Supplement: s1 [file s1]

## Supplementary files

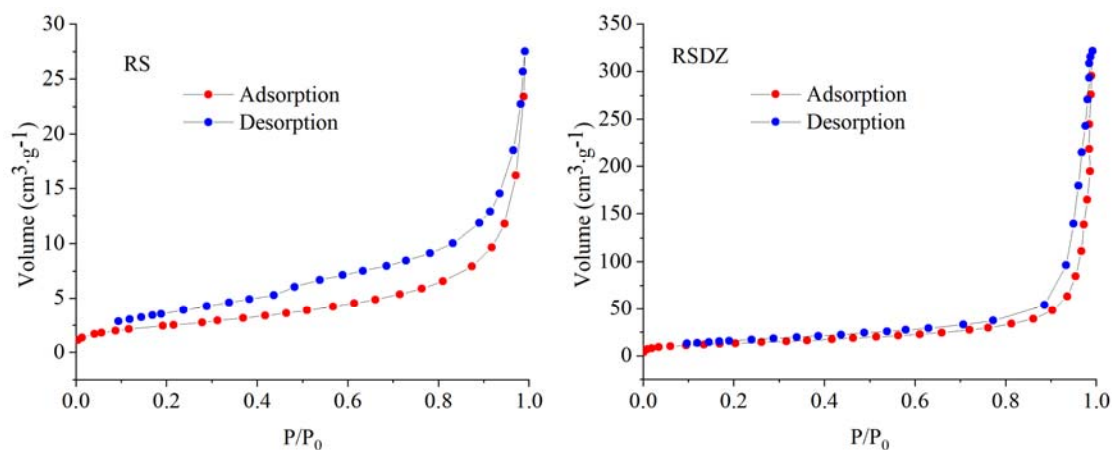

Figure S1. N<sub>2</sub> adsorption isotherms of RS and RSDZ

Table S1. Basic properties of Zn<sup>2+</sup>、Pb<sup>2+</sup> and Cu<sup>2+</sup> [1]

| Heavy metal ions | Ionic radius (Å) | pK <sub>h</sub> | Relative atomic weight |
|------------------|------------------|-----------------|------------------------|
| Zn <sup>2+</sup> | 0.74             | 9.0             | 65.41                  |
| Pb <sup>2+</sup> | 1.19             | 7.71            | 207.2                  |
| Cu <sup>2+</sup> | 0.72             | 8.0             | 63.55                  |

## Reference

- [1] Park J-H; Ok Y-S; Kim S-H; et al. Competitive adsorption of heavy metals onto sesame straw biochar in aqueous solutions [J]. Chemosphere, 2016, 142: 77-83.
